# Supplementary material for: Revealing fitness and virulence determinants of hypervirulent Klebsiella pneumoniae during infection in Galleria mellonella using a transposon library
Source: Front Cell Infect Microbiol. 2025 Aug 22;15:1643224. doi: 10.3389/fcimb.2025.1643224 (PMC12411516; doi:10.3389/fcimb.2025.1643224)
Supplement: Supplementary file 2 [file Table1.xlsx]

## Sheet: vs
Gene IDs from the NCBI CP194565 project	Original gene IDs in the paper
ACRYSC_00005	K43816_GM000001
ACRYSC_00010	K43816_GM000002
ACRYSC_00015	K43816_GM000003
ACRYSC_00020	K43816_GM000004
ACRYSC_00025	K43816_GM000005
ACRYSC_00030	K43816_GM000006
ACRYSC_00035	K43816_GM000007
ACRYSC_00040	K43816_GM000008
ACRYSC_00045	K43816_GM000009
ACRYSC_00050	K43816_GM000010
ACRYSC_00055	K43816_GM000011
ACRYSC_00060	K43816_GM000012
ACRYSC_00065	K43816_GM000013
ACRYSC_00070	K43816_GM000014
ACRYSC_00075	K43816_GM000015
ACRYSC_00080	K43816_GM000016
ACRYSC_00095	K43816_GM000020
ACRYSC_00100	K43816_GM000021
ACRYSC_00105	K43816_GM000022
ACRYSC_00110	K43816_GM000023
ACRYSC_00115	K43816_GM000024
ACRYSC_00125	K43816_GM000026
ACRYSC_00130	K43816_GM000027
ACRYSC_00140	K43816_GM000028
ACRYSC_00145	K43816_GM000029
ACRYSC_00150	K43816_GM000030
ACRYSC_00155	K43816_GM000031
ACRYSC_00160	K43816_GM000032
ACRYSC_00170	K43816_GM000033
ACRYSC_00175	K43816_GM000034
ACRYSC_00180	K43816_GM000035
ACRYSC_00185	K43816_GM000036
ACRYSC_00195	K43816_GM000038
ACRYSC_00200	K43816_GM000039
ACRYSC_00205	K43816_GM000040
ACRYSC_00215	K43816_GM000041
ACRYSC_00220	K43816_GM000042
ACRYSC_00225	K43816_GM000043
ACRYSC_00230	K43816_GM000044
ACRYSC_00235	K43816_GM000045
ACRYSC_00240	K43816_GM000046
ACRYSC_00245	K43816_GM000047
ACRYSC_00250	K43816_GM000048
ACRYSC_00255	K43816_GM000049
ACRYSC_00260	K43816_GM000050
ACRYSC_00265	K43816_GM000051
ACRYSC_00270	K43816_GM000052
ACRYSC_00275	K43816_GM000053
ACRYSC_00280	K43816_GM000054
ACRYSC_00285	K43816_GM000055
ACRYSC_00290	K43816_GM000056
ACRYSC_00295	K43816_GM000057
ACRYSC_00300	K43816_GM000058
ACRYSC_00305	K43816_GM000059
ACRYSC_00310	K43816_GM000060
ACRYSC_00315	K43816_GM000061
ACRYSC_00320	K43816_GM000062
ACRYSC_00325	K43816_GM000063
ACRYSC_00330	K43816_GM000064
ACRYSC_00335	K43816_GM000065
ACRYSC_00340	K43816_GM000066
ACRYSC_00345	K43816_GM000067
ACRYSC_00350	K43816_GM000068
ACRYSC_00355	K43816_GM000069
ACRYSC_00375	K43816_GM000072
ACRYSC_00380	K43816_GM000073
ACRYSC_00385	K43816_GM000074
ACRYSC_00390	K43816_GM000075
ACRYSC_00395	K43816_GM000076
ACRYSC_00400	K43816_GM000077
ACRYSC_00405	K43816_GM000078
ACRYSC_00410	K43816_GM000079
ACRYSC_00415	K43816_GM000080
ACRYSC_00420	K43816_GM000081
ACRYSC_00425	K43816_GM000082
ACRYSC_00430	K43816_GM000083
ACRYSC_00435	K43816_GM000084
ACRYSC_00440	K43816_GM000085
ACRYSC_00445	K43816_GM000086
ACRYSC_00450	K43816_GM000087
ACRYSC_00455	K43816_GM000088
ACRYSC_00465	K43816_GM000090
ACRYSC_00470	K43816_GM000091
ACRYSC_00475	K43816_GM000092
ACRYSC_00480	K43816_GM000093
ACRYSC_00485	K43816_GM000094
ACRYSC_00490	K43816_GM000095
ACRYSC_00495	K43816_GM000096
ACRYSC_00500	K43816_GM000097
ACRYSC_00505	K43816_GM000098
ACRYSC_00510	K43816_GM000099
ACRYSC_00515	K43816_GM000100
ACRYSC_00520	K43816_GM000101
ACRYSC_00530	K43816_GM000103
ACRYSC_00535	K43816_GM000104
ACRYSC_00540	K43816_GM000105
ACRYSC_00545	K43816_GM000106
ACRYSC_00550	K43816_GM000107
ACRYSC_00555	K43816_GM000108
ACRYSC_00560	K43816_GM000109
ACRYSC_00565	K43816_GM000110
ACRYSC_00570	K43816_GM000111
ACRYSC_00575	K43816_GM000112
ACRYSC_00580	K43816_GM000113
ACRYSC_00585	K43816_GM000114
ACRYSC_00590	K43816_GM000115
ACRYSC_00595	K43816_GM000116
ACRYSC_00600	K43816_GM000117
ACRYSC_00605	K43816_GM000118
ACRYSC_00610	K43816_GM000119
ACRYSC_00615	K43816_GM000120
ACRYSC_00630	K43816_GM000122
ACRYSC_00635	K43816_GM000123
ACRYSC_00640	K43816_GM000124
ACRYSC_00645	K43816_GM000125
ACRYSC_00650	K43816_GM000126
ACRYSC_00655	K43816_GM000127
ACRYSC_00660	K43816_GM000128
ACRYSC_00665	K43816_GM000129
ACRYSC_00670	K43816_GM000130
ACRYSC_00675	K43816_GM000131
ACRYSC_00680	K43816_GM000132
ACRYSC_00685	K43816_GM000133
ACRYSC_00690	K43816_GM000134
ACRYSC_00695	K43816_GM000135
ACRYSC_00700	K43816_GM000136
ACRYSC_00710	K43816_GM000138
ACRYSC_00715	K43816_GM000139
ACRYSC_00720	K43816_GM000140
ACRYSC_00730	K43816_GM000142
ACRYSC_00735	K43816_GM000143
ACRYSC_00740	K43816_GM000144
ACRYSC_00745	K43816_GM000145
ACRYSC_00750	K43816_GM000146
ACRYSC_00755	K43816_GM000147
ACRYSC_00760	K43816_GM000148
ACRYSC_00765	K43816_GM000149
ACRYSC_00770	K43816_GM000150
ACRYSC_00775	K43816_GM000151
ACRYSC_00785	K43816_GM000153
ACRYSC_00790	K43816_GM000154
ACRYSC_00795	K43816_GM000155
ACRYSC_00800	K43816_GM000156
ACRYSC_00805	K43816_GM000157
ACRYSC_00810	K43816_GM000158
ACRYSC_00815	K43816_GM000159
ACRYSC_00820	K43816_GM000160
ACRYSC_00825	K43816_GM000161
ACRYSC_00830	K43816_GM000162
ACRYSC_00835	K43816_GM000164
ACRYSC_00840	K43816_GM000165
ACRYSC_00845	K43816_GM000166
ACRYSC_00850	K43816_GM000167
ACRYSC_00855	K43816_GM000168
ACRYSC_00870	K43816_GM000170
ACRYSC_00875	K43816_GM000171
ACRYSC_00880	K43816_GM000172
ACRYSC_00890	K43816_GM000173
ACRYSC_00895	K43816_GM000174
ACRYSC_00900	K43816_GM000175
ACRYSC_00905	K43816_GM000176
ACRYSC_00910	K43816_GM000177
ACRYSC_00915	K43816_GM000178
ACRYSC_00920	K43816_GM000179
ACRYSC_00925	K43816_GM000180
ACRYSC_00930	K43816_GM000181
ACRYSC_00935	K43816_GM000182
ACRYSC_00940	K43816_GM000183
ACRYSC_00945	K43816_GM000184
ACRYSC_00950	K43816_GM000185
ACRYSC_00955	K43816_GM000186
ACRYSC_00960	K43816_GM000187
ACRYSC_00965	K43816_GM000188
ACRYSC_00975	K43816_GM000189
ACRYSC_00980	K43816_GM000190
ACRYSC_00985	K43816_GM000191
ACRYSC_00990	K43816_GM000192
ACRYSC_00995	K43816_GM000193
ACRYSC_01000	K43816_GM000194
ACRYSC_01005	K43816_GM000195
ACRYSC_01010	K43816_GM000196
ACRYSC_01015	K43816_GM000197
ACRYSC_01020	K43816_GM000198
ACRYSC_01025	K43816_GM000199
ACRYSC_01030	K43816_GM000200
ACRYSC_01035	K43816_GM000201
ACRYSC_01040	K43816_GM000202
ACRYSC_01045	K43816_GM000203
ACRYSC_01050	K43816_GM000204
ACRYSC_01055	K43816_GM000205
ACRYSC_01060	K43816_GM000206
ACRYSC_01070	K43816_GM000208
ACRYSC_01075	K43816_GM000209
ACRYSC_01080	K43816_GM000210
ACRYSC_01085	K43816_GM000211
ACRYSC_01090	K43816_GM000212
ACRYSC_01100	K43816_GM000213
ACRYSC_01110	K43816_GM000215
ACRYSC_01115	K43816_GM000216
ACRYSC_01120	K43816_GM000217
ACRYSC_01125	K43816_GM000218
ACRYSC_01130	K43816_GM000219
ACRYSC_01135	K43816_GM000220
ACRYSC_01140	K43816_GM000221
ACRYSC_01145	K43816_GM000222
ACRYSC_01150	K43816_GM000223
ACRYSC_01155	K43816_GM000224
ACRYSC_01160	K43816_GM000225
ACRYSC_01165	K43816_GM000226
ACRYSC_01170	K43816_GM000227
ACRYSC_01175	K43816_GM000228
ACRYSC_01180	K43816_GM000229
ACRYSC_01185	K43816_GM000230
ACRYSC_01190	K43816_GM000231
ACRYSC_01195	K43816_GM000232
ACRYSC_01205	K43816_GM000235
ACRYSC_01210	K43816_GM000236
ACRYSC_01215	K43816_GM000237
ACRYSC_01220	K43816_GM000238
ACRYSC_01225	K43816_GM000239
ACRYSC_01230	K43816_GM000240
ACRYSC_01235	K43816_GM000241
ACRYSC_01240	K43816_GM000242
ACRYSC_01245	K43816_GM000243
ACRYSC_01250	K43816_GM000244
ACRYSC_01255	K43816_GM000245
ACRYSC_01260	K43816_GM000246
ACRYSC_01265	K43816_GM000247
ACRYSC_01270	K43816_GM000248
ACRYSC_01275	K43816_GM000249
ACRYSC_01285	K43816_GM000251
ACRYSC_01290	K43816_GM000252
ACRYSC_01295	K43816_GM000253
ACRYSC_01300	K43816_GM000254
ACRYSC_01305	K43816_GM000255
ACRYSC_01310	K43816_GM000256
ACRYSC_01315	K43816_GM000257
ACRYSC_01320	K43816_GM000258
ACRYSC_01325	K43816_GM000259
ACRYSC_01330	K43816_GM000260
ACRYSC_01335	K43816_GM000261
ACRYSC_01340	K43816_GM000262
ACRYSC_01345	K43816_GM000263
ACRYSC_01350	K43816_GM000264
ACRYSC_01355	K43816_GM000265
ACRYSC_01360	K43816_GM000266
ACRYSC_01365	K43816_GM000267
ACRYSC_01370	K43816_GM000268
ACRYSC_01375	K43816_GM000269
ACRYSC_01380	K43816_GM000270
ACRYSC_01385	K43816_GM000271
ACRYSC_01390	K43816_GM000272
ACRYSC_01395	K43816_GM000273
ACRYSC_01400	K43816_GM000274
ACRYSC_01405	K43816_GM000275
ACRYSC_01410	K43816_GM000276
ACRYSC_01415	K43816_GM000277
ACRYSC_01420	K43816_GM000278
ACRYSC_01425	K43816_GM000279
ACRYSC_01430	K43816_GM000280
ACRYSC_01440	K43816_GM000282
ACRYSC_01445	K43816_GM000283
ACRYSC_01450	K43816_GM000284
ACRYSC_01455	K43816_GM000285
ACRYSC_01460	K43816_GM000286
ACRYSC_01465	K43816_GM000287
ACRYSC_01470	K43816_GM000289
ACRYSC_01475	K43816_GM000290
ACRYSC_01480	K43816_GM000291
ACRYSC_01485	K43816_GM000292
ACRYSC_01490	K43816_GM000293
ACRYSC_01495	K43816_GM000294
ACRYSC_01500	K43816_GM000295
ACRYSC_01505	K43816_GM000296
ACRYSC_01510	K43816_GM000297
ACRYSC_01515	K43816_GM000298
ACRYSC_01520	K43816_GM000299
ACRYSC_01525	K43816_GM000300
ACRYSC_01530	K43816_GM000301
ACRYSC_01535	K43816_GM000302
ACRYSC_01540	K43816_GM000303
ACRYSC_01545	K43816_GM000304
ACRYSC_01550	K43816_GM000305
ACRYSC_01555	K43816_GM000306
ACRYSC_01560	K43816_GM000307
ACRYSC_01565	K43816_GM000308
ACRYSC_01575	K43816_GM000310
ACRYSC_01580	K43816_GM000311
ACRYSC_01585	K43816_GM000312
ACRYSC_01590	K43816_GM000313
ACRYSC_01595	K43816_GM000314
ACRYSC_01600	K43816_GM000315
ACRYSC_01605	K43816_GM000316
ACRYSC_01610	K43816_GM000317
ACRYSC_01615	K43816_GM000318
ACRYSC_01620	K43816_GM000319
ACRYSC_01625	K43816_GM000320
ACRYSC_01630	K43816_GM000321
ACRYSC_01635	K43816_GM000322
ACRYSC_01640	K43816_GM000323
ACRYSC_01645	K43816_GM000324
ACRYSC_01650	K43816_GM000325
ACRYSC_01655	K43816_GM000326
ACRYSC_01660	K43816_GM000327
ACRYSC_01665	K43816_GM000328
ACRYSC_01670	K43816_GM000329
ACRYSC_01675	K43816_GM000330
ACRYSC_01680	K43816_GM000331
ACRYSC_01685	K43816_GM000332
ACRYSC_01690	K43816_GM000333
ACRYSC_01695	K43816_GM000335
ACRYSC_01700	K43816_GM000336
ACRYSC_01705	K43816_GM000337
ACRYSC_01710	K43816_GM000338
ACRYSC_01715	K43816_GM000339
ACRYSC_01720	K43816_GM000340
ACRYSC_01725	K43816_GM000341
ACRYSC_01730	K43816_GM000342
ACRYSC_01740	K43816_GM000344
ACRYSC_01745	K43816_GM000345
ACRYSC_01750	K43816_GM000346
ACRYSC_01755	K43816_GM000347
ACRYSC_01760	K43816_GM000348
ACRYSC_01770	K43816_GM000349
ACRYSC_01775	K43816_GM000350
ACRYSC_01780	K43816_GM000351
ACRYSC_01785	K43816_GM000352
ACRYSC_01790	K43816_GM000353
ACRYSC_01795	K43816_GM000354
ACRYSC_01800	K43816_GM000355
ACRYSC_01805	K43816_GM000356
ACRYSC_01815	K43816_GM000358
ACRYSC_01820	K43816_GM000359
ACRYSC_01835	K43816_GM000364
ACRYSC_01840	K43816_GM000365
ACRYSC_01845	K43816_GM000366
ACRYSC_01850	K43816_GM000367
ACRYSC_01855	K43816_GM000368
ACRYSC_01860	K43816_GM000369
ACRYSC_01865	K43816_GM000370
ACRYSC_01870	K43816_GM000371
ACRYSC_01875	K43816_GM000372
ACRYSC_01880	K43816_GM000373
ACRYSC_01885	K43816_GM000374
ACRYSC_01890	K43816_GM000375
ACRYSC_01895	K43816_GM000376
ACRYSC_01900	K43816_GM000377
ACRYSC_01905	K43816_GM000378
ACRYSC_01910	K43816_GM000379
ACRYSC_01915	K43816_GM000380
ACRYSC_01920	K43816_GM000381
ACRYSC_01925	K43816_GM000382
ACRYSC_01930	K43816_GM000383
ACRYSC_01935	K43816_GM000384
ACRYSC_01940	K43816_GM000385
ACRYSC_01945	K43816_GM000386
ACRYSC_01950	K43816_GM000387
ACRYSC_01955	K43816_GM000388
ACRYSC_01960	K43816_GM004834
ACRYSC_01960	K43816_GM000389
ACRYSC_01970	K43816_GM000391
ACRYSC_01975	K43816_GM000392
ACRYSC_01980	K43816_GM000393
ACRYSC_01985	K43816_GM000394
ACRYSC_01990	K43816_GM000395
ACRYSC_01995	K43816_GM000396
ACRYSC_02000	K43816_GM000397
ACRYSC_02005	K43816_GM000398
ACRYSC_02010	K43816_GM000399
ACRYSC_02015	K43816_GM000400
ACRYSC_02020	K43816_GM000401
ACRYSC_02025	K43816_GM000402
ACRYSC_02030	K43816_GM000403
ACRYSC_02035	K43816_GM000404
ACRYSC_02040	K43816_GM000405
ACRYSC_02045	K43816_GM000406
ACRYSC_02050	K43816_GM000407
ACRYSC_02055	K43816_GM000408
ACRYSC_02060	K43816_GM000409
ACRYSC_02065	K43816_GM000410
ACRYSC_02070	K43816_GM000411
ACRYSC_02075	K43816_GM000412
ACRYSC_02080	K43816_GM000413
ACRYSC_02085	K43816_GM000414
ACRYSC_02095	K43816_GM000415
ACRYSC_02110	K43816_GM000417
ACRYSC_02115	K43816_GM000418
ACRYSC_02120	K43816_GM000419
ACRYSC_02125	K43816_GM000420
ACRYSC_02135	K43816_GM000421
ACRYSC_02140	K43816_GM000422
ACRYSC_02145	K43816_GM000423
ACRYSC_02150	K43816_GM000424
ACRYSC_02155	K43816_GM000425
ACRYSC_02160	K43816_GM000426
ACRYSC_02165	K43816_GM000427
ACRYSC_02170	K43816_GM000428
ACRYSC_02175	K43816_GM000429
ACRYSC_02180	K43816_GM000430
ACRYSC_02185	K43816_GM000431
ACRYSC_02190	K43816_GM000432
ACRYSC_02220	K43816_GM000433
ACRYSC_02225	K43816_GM000434
ACRYSC_02235	K43816_GM000436
ACRYSC_02240	K43816_GM000437
ACRYSC_02245	K43816_GM000438
ACRYSC_02250	K43816_GM000439
ACRYSC_02255	K43816_GM000440
ACRYSC_02260	K43816_GM000441
ACRYSC_02265	K43816_GM000442
ACRYSC_02270	K43816_GM000443
ACRYSC_02275	K43816_GM000444
ACRYSC_02280	K43816_GM000445
ACRYSC_02285	K43816_GM000446
ACRYSC_02290	K43816_GM000447
ACRYSC_02295	K43816_GM000448
ACRYSC_02300	K43816_GM000449
ACRYSC_02305	K43816_GM000450
ACRYSC_02310	K43816_GM000451
ACRYSC_02315	K43816_GM000452
ACRYSC_02320	K43816_GM000453
ACRYSC_02330	K43816_GM000455
ACRYSC_02335	K43816_GM000456
ACRYSC_02340	K43816_GM000457
ACRYSC_02345	K43816_GM000458
ACRYSC_02350	K43816_GM000459
ACRYSC_02355	K43816_GM000460
ACRYSC_02360	K43816_GM000461
ACRYSC_02365	K43816_GM000462
ACRYSC_02370	K43816_GM000463
ACRYSC_02380	K43816_GM000465
ACRYSC_02385	K43816_GM000466
ACRYSC_02390	K43816_GM000467
ACRYSC_02395	K43816_GM000468
ACRYSC_02400	K43816_GM000469
ACRYSC_02405	K43816_GM000470
ACRYSC_02410	K43816_GM000471
ACRYSC_02415	K43816_GM000472
ACRYSC_02420	K43816_GM000473
ACRYSC_02430	K43816_GM000475
ACRYSC_02435	K43816_GM000476
ACRYSC_02440	K43816_GM000477
ACRYSC_02445	K43816_GM000478
ACRYSC_02450	K43816_GM000479
ACRYSC_02460	K43816_GM000480
ACRYSC_02465	K43816_GM000481
ACRYSC_02470	K43816_GM000482
ACRYSC_02475	K43816_GM000483
ACRYSC_02480	K43816_GM000484
ACRYSC_02485	K43816_GM000485
ACRYSC_02490	K43816_GM000486
ACRYSC_02495	K43816_GM000487
ACRYSC_02500	K43816_GM000489
ACRYSC_02505	K43816_GM000490
ACRYSC_02510	K43816_GM000491
ACRYSC_02515	K43816_GM000492
ACRYSC_02520	K43816_GM000493
ACRYSC_02525	K43816_GM000494
ACRYSC_02530	K43816_GM000495
ACRYSC_02535	K43816_GM000496
ACRYSC_02540	K43816_GM000497
ACRYSC_02545	K43816_GM000498
ACRYSC_02550	K43816_GM000499
ACRYSC_02555	K43816_GM000500
ACRYSC_02560	K43816_GM000501
ACRYSC_02565	K43816_GM000502
ACRYSC_02570	K43816_GM000503
ACRYSC_02575	K43816_GM000504
ACRYSC_02580	K43816_GM000505
ACRYSC_02585	K43816_GM000506
ACRYSC_02590	K43816_GM000507
ACRYSC_02595	K43816_GM000508
ACRYSC_02600	K43816_GM000509
ACRYSC_02605	K43816_GM000510
ACRYSC_02610	K43816_GM000511
ACRYSC_02615	K43816_GM000512
ACRYSC_02620	K43816_GM000513
ACRYSC_02625	K43816_GM000514
ACRYSC_02630	K43816_GM000515
ACRYSC_02635	K43816_GM000516
ACRYSC_02645	K43816_GM000518
ACRYSC_02650	K43816_GM000519
ACRYSC_02655	K43816_GM000520
ACRYSC_02660	K43816_GM000521
ACRYSC_02665	K43816_GM000522
ACRYSC_02670	K43816_GM000523
ACRYSC_02675	K43816_GM000524
ACRYSC_02690	K43816_GM000526
ACRYSC_02695	K43816_GM000527
ACRYSC_02700	K43816_GM000528
ACRYSC_02710	K43816_GM000529
ACRYSC_02715	K43816_GM000530
ACRYSC_02720	K43816_GM000531
ACRYSC_02725	K43816_GM000532
ACRYSC_02730	K43816_GM000533
ACRYSC_02735	K43816_GM000534
ACRYSC_02740	K43816_GM000536
ACRYSC_02745	K43816_GM000537
ACRYSC_02755	K43816_GM000538
ACRYSC_02760	K43816_GM000539
ACRYSC_02765	K43816_GM000540
ACRYSC_02770	K43816_GM000541
ACRYSC_02775	K43816_GM000542
ACRYSC_02780	K43816_GM000543
ACRYSC_02785	K43816_GM000544
ACRYSC_02790	K43816_GM000545
ACRYSC_02795	K43816_GM000546
ACRYSC_02800	K43816_GM000547
ACRYSC_02805	K43816_GM000548
ACRYSC_02810	K43816_GM000549
ACRYSC_02815	K43816_GM000550
ACRYSC_02820	K43816_GM000551
ACRYSC_02825	K43816_GM000552
ACRYSC_02835	K43816_GM000554
ACRYSC_02840	K43816_GM000556
ACRYSC_02845	K43816_GM000558
ACRYSC_02850	K43816_GM000559
ACRYSC_02855	K43816_GM000560
ACRYSC_02860	K43816_GM000561
ACRYSC_02870	K43816_GM000562
ACRYSC_02875	K43816_GM000563
ACRYSC_02880	K43816_GM000564
ACRYSC_02885	K43816_GM000565
ACRYSC_02890	K43816_GM000566
ACRYSC_02895	K43816_GM000567
ACRYSC_02900	K43816_GM000568
ACRYSC_02905	K43816_GM000569
ACRYSC_02910	K43816_GM000570
ACRYSC_02915	K43816_GM000571
ACRYSC_02920	K43816_GM000572
ACRYSC_02925	K43816_GM000573
ACRYSC_02930	K43816_GM000574
ACRYSC_02935	K43816_GM000575
ACRYSC_02940	K43816_GM000576
ACRYSC_02945	K43816_GM000577
ACRYSC_02950	K43816_GM000578
ACRYSC_02955	K43816_GM000579
ACRYSC_02960	K43816_GM000580
ACRYSC_02965	K43816_GM000581
ACRYSC_02970	K43816_GM000582
ACRYSC_02975	K43816_GM000583
ACRYSC_02980	K43816_GM000584
ACRYSC_02985	K43816_GM000585
ACRYSC_02990	K43816_GM000586
ACRYSC_02995	K43816_GM000587
ACRYSC_03000	K43816_GM000588
ACRYSC_03005	K43816_GM000589
ACRYSC_03010	K43816_GM000590
ACRYSC_03015	K43816_GM000591
ACRYSC_03020	K43816_GM000592
ACRYSC_03025	K43816_GM000593
ACRYSC_03030	K43816_GM000594
ACRYSC_03035	K43816_GM000595
ACRYSC_03040	K43816_GM000596
ACRYSC_03045	K43816_GM000597
ACRYSC_03050	K43816_GM000598
ACRYSC_03055	K43816_GM000599
ACRYSC_03060	K43816_GM000600
ACRYSC_03065	K43816_GM000601
ACRYSC_03070	K43816_GM000602
ACRYSC_03075	K43816_GM000603
ACRYSC_03085	K43816_GM000604
ACRYSC_03090	K43816_GM000605
ACRYSC_03095	K43816_GM000606
ACRYSC_03100	K43816_GM000607
ACRYSC_03105	K43816_GM000608
ACRYSC_03110	K43816_GM000609
ACRYSC_03115	K43816_GM000610
ACRYSC_03120	K43816_GM000611
ACRYSC_03125	K43816_GM000612
ACRYSC_03130	K43816_GM000613
ACRYSC_03135	K43816_GM000614
ACRYSC_03140	K43816_GM000615
ACRYSC_03145	K43816_GM000616
ACRYSC_03150	K43816_GM000617
ACRYSC_03155	K43816_GM000618
ACRYSC_03160	K43816_GM000619
ACRYSC_03165	K43816_GM000620
ACRYSC_03170	K43816_GM000621
ACRYSC_03180	K43816_GM000622
ACRYSC_03185	K43816_GM000623
ACRYSC_03190	K43816_GM000624
ACRYSC_03195	K43816_GM000625
ACRYSC_03200	K43816_GM000626
ACRYSC_03205	K43816_GM000627
ACRYSC_03210	K43816_GM000628
ACRYSC_03215	K43816_GM000629
ACRYSC_03220	K43816_GM000630
ACRYSC_03225	K43816_GM000631
ACRYSC_03230	K43816_GM000632
ACRYSC_03235	K43816_GM000633
ACRYSC_03240	K43816_GM000634
ACRYSC_03255	K43816_GM000636
ACRYSC_03260	K43816_GM000637
ACRYSC_03265	K43816_GM000638
ACRYSC_03270	K43816_GM000639
ACRYSC_03275	K43816_GM000640
ACRYSC_03280	K43816_GM000642
ACRYSC_03285	K43816_GM000643
ACRYSC_03290	K43816_GM000644
ACRYSC_03305	K43816_GM000646
ACRYSC_03310	K43816_GM000647
ACRYSC_03320	K43816_GM000649
ACRYSC_03325	K43816_GM000650
ACRYSC_03330	K43816_GM000651
ACRYSC_03335	K43816_GM000652
ACRYSC_03340	K43816_GM000653
ACRYSC_03345	K43816_GM000654
ACRYSC_03355	K43816_GM000656
ACRYSC_03360	K43816_GM000657
ACRYSC_03365	K43816_GM000658
ACRYSC_03370	K43816_GM000659
ACRYSC_03375	K43816_GM000660
ACRYSC_03380	K43816_GM000661
ACRYSC_03385	K43816_GM000662
ACRYSC_03390	K43816_GM000663
ACRYSC_03395	K43816_GM000664
ACRYSC_03405	K43816_GM000666
ACRYSC_03415	K43816_GM000668
ACRYSC_03420	K43816_GM000669
ACRYSC_03425	K43816_GM000670
ACRYSC_03430	K43816_GM000671
ACRYSC_03435	K43816_GM000672
ACRYSC_03440	K43816_GM000673
ACRYSC_03445	K43816_GM000675
ACRYSC_03450	K43816_GM000676
ACRYSC_03455	K43816_GM000677
ACRYSC_03460	K43816_GM000678
ACRYSC_03465	K43816_GM000679
ACRYSC_03470	K43816_GM000680
ACRYSC_03475	K43816_GM000681
ACRYSC_03480	K43816_GM000682
ACRYSC_03485	K43816_GM000683
ACRYSC_03495	K43816_GM000684
ACRYSC_03505	K43816_GM000687
ACRYSC_03510	K43816_GM000688
ACRYSC_03515	K43816_GM000689
ACRYSC_03520	K43816_GM000690
ACRYSC_03525	K43816_GM000691
ACRYSC_03530	K43816_GM000692
ACRYSC_03535	K43816_GM000693
ACRYSC_03540	K43816_GM000694
ACRYSC_03545	K43816_GM000695
ACRYSC_03550	K43816_GM000696
ACRYSC_03555	K43816_GM000697
ACRYSC_03560	K43816_GM000698
ACRYSC_03565	K43816_GM000699
ACRYSC_03570	K43816_GM000700
ACRYSC_03590	K43816_GM000704
ACRYSC_03595	K43816_GM000705
ACRYSC_03600	K43816_GM000706
ACRYSC_03605	K43816_GM000707
ACRYSC_03610	K43816_GM000708
ACRYSC_03615	K43816_GM000709
ACRYSC_03620	K43816_GM000710
ACRYSC_03625	K43816_GM000711
ACRYSC_03630	K43816_GM000712
ACRYSC_03635	K43816_GM000713
ACRYSC_03640	K43816_GM000714
ACRYSC_03645	K43816_GM000715
ACRYSC_03650	K43816_GM000716
ACRYSC_03655	K43816_GM000717
ACRYSC_03660	K43816_GM000718
ACRYSC_03665	K43816_GM000719
ACRYSC_03670	K43816_GM000720
ACRYSC_03675	K43816_GM000721
ACRYSC_03680	K43816_GM000722
ACRYSC_03685	K43816_GM000723
ACRYSC_03690	K43816_GM000724
ACRYSC_03695	K43816_GM000725
ACRYSC_03700	K43816_GM000726
ACRYSC_03705	K43816_GM000727
ACRYSC_03710	K43816_GM000728
ACRYSC_03715	K43816_GM000729
ACRYSC_03720	K43816_GM000730
ACRYSC_03735	K43816_GM000732
ACRYSC_03740	K43816_GM000733
ACRYSC_03745	K43816_GM000734
ACRYSC_03750	K43816_GM000735
ACRYSC_03755	K43816_GM000736
ACRYSC_03760	K43816_GM000737
ACRYSC_03765	K43816_GM000738
ACRYSC_03770	K43816_GM000739
ACRYSC_03775	K43816_GM000740
ACRYSC_03780	K43816_GM000741
ACRYSC_03785	K43816_GM000742
ACRYSC_03790	K43816_GM000743
ACRYSC_03795	K43816_GM000744
ACRYSC_03800	K43816_GM000745
ACRYSC_03805	K43816_GM000746
ACRYSC_03810	K43816_GM000747
ACRYSC_03815	K43816_GM000748
ACRYSC_03820	K43816_GM000749
ACRYSC_03825	K43816_GM000750
ACRYSC_03830	K43816_GM000751
ACRYSC_03835	K43816_GM000752
ACRYSC_03840	K43816_GM000753
ACRYSC_03845	K43816_GM000754
ACRYSC_03850	K43816_GM000755
ACRYSC_03855	K43816_GM000756
ACRYSC_03860	K43816_GM000757
ACRYSC_03865	K43816_GM000758
ACRYSC_03870	K43816_GM000759
ACRYSC_03875	K43816_GM000761
ACRYSC_03880	K43816_GM000762
ACRYSC_03890	K43816_GM000763
ACRYSC_03895	K43816_GM000764
ACRYSC_03900	K43816_GM000765
ACRYSC_03905	K43816_GM000766
ACRYSC_03910	K43816_GM000767
ACRYSC_03920	K43816_GM000769
ACRYSC_03925	K43816_GM000770
ACRYSC_03930	K43816_GM000771
ACRYSC_03935	K43816_GM004512
ACRYSC_03935	K43816_GM003740
ACRYSC_03935	K43816_GM003659
ACRYSC_03935	K43816_GM002524
ACRYSC_03935	K43816_GM000773
ACRYSC_03940	K43816_GM000774
ACRYSC_03945	K43816_GM000775
ACRYSC_03950	K43816_GM000776
ACRYSC_03955	K43816_GM000777
ACRYSC_03960	K43816_GM000779
ACRYSC_03965	K43816_GM000780
ACRYSC_03970	K43816_GM000781
ACRYSC_03975	K43816_GM000782
ACRYSC_03980	K43816_GM000783
ACRYSC_03985	K43816_GM000784
ACRYSC_03990	K43816_GM000785
ACRYSC_03995	K43816_GM000786
ACRYSC_04000	K43816_GM000787
ACRYSC_04005	K43816_GM000788
ACRYSC_04010	K43816_GM000789
ACRYSC_04015	K43816_GM000790
ACRYSC_04020	K43816_GM000791
ACRYSC_04025	K43816_GM000792
ACRYSC_04030	K43816_GM000793
ACRYSC_04035	K43816_GM000794
ACRYSC_04040	K43816_GM000795
ACRYSC_04045	K43816_GM000796
ACRYSC_04050	K43816_GM000797
ACRYSC_04060	K43816_GM000798
ACRYSC_04065	K43816_GM000799
ACRYSC_04080	K43816_GM000801
ACRYSC_04085	K43816_GM000802
ACRYSC_04090	K43816_GM000803
ACRYSC_04095	K43816_GM000804
ACRYSC_04100	K43816_GM000805
ACRYSC_04105	K43816_GM000806
ACRYSC_04110	K43816_GM000807
ACRYSC_04115	K43816_GM000808
ACRYSC_04120	K43816_GM000809
ACRYSC_04125	K43816_GM000810
ACRYSC_04130	K43816_GM000811
ACRYSC_04135	K43816_GM000812
ACRYSC_04140	K43816_GM000813
ACRYSC_04145	K43816_GM000814
ACRYSC_04150	K43816_GM000815
ACRYSC_04155	K43816_GM000816
ACRYSC_04160	K43816_GM000817
ACRYSC_04165	K43816_GM000818
ACRYSC_04170	K43816_GM000819
ACRYSC_04175	K43816_GM000820
ACRYSC_04180	K43816_GM000821
ACRYSC_04185	K43816_GM000822
ACRYSC_04200	K43816_GM000824
ACRYSC_04205	K43816_GM000825
ACRYSC_04210	K43816_GM000826
ACRYSC_04215	K43816_GM000827
ACRYSC_04220	K43816_GM000828
ACRYSC_04225	K43816_GM000829
ACRYSC_04230	K43816_GM000830
ACRYSC_04235	K43816_GM000831
ACRYSC_04240	K43816_GM000832
ACRYSC_04245	K43816_GM000833
ACRYSC_04250	K43816_GM000834
ACRYSC_04255	K43816_GM000835
ACRYSC_04260	K43816_GM000836
ACRYSC_04265	K43816_GM000837
ACRYSC_04270	K43816_GM000838
ACRYSC_04275	K43816_GM000839
ACRYSC_04285	K43816_GM000841
ACRYSC_04290	K43816_GM000842
ACRYSC_04295	K43816_GM000843
ACRYSC_04300	K43816_GM000844
ACRYSC_04305	K43816_GM000845
ACRYSC_04310	K43816_GM000846
ACRYSC_04315	K43816_GM000847
ACRYSC_04320	K43816_GM000848
ACRYSC_04325	K43816_GM000849
ACRYSC_04330	K43816_GM000850
ACRYSC_04335	K43816_GM000851
ACRYSC_04340	K43816_GM000852
ACRYSC_04345	K43816_GM000853
ACRYSC_04350	K43816_GM000854
ACRYSC_04355	K43816_GM000855
ACRYSC_04365	K43816_GM000857
ACRYSC_04370	K43816_GM000858
ACRYSC_04375	K43816_GM000859
ACRYSC_04380	K43816_GM000860
ACRYSC_04385	K43816_GM000861
ACRYSC_04390	K43816_GM000863
ACRYSC_04405	K43816_GM000865
ACRYSC_04410	K43816_GM000866
ACRYSC_04415	K43816_GM000867
ACRYSC_04420	K43816_GM000868
ACRYSC_04425	K43816_GM000870
ACRYSC_04430	K43816_GM000871
ACRYSC_04435	K43816_GM000872
ACRYSC_04440	K43816_GM000873
ACRYSC_04445	K43816_GM000874
ACRYSC_04450	K43816_GM000875
ACRYSC_04460	K43816_GM000877
ACRYSC_04465	K43816_GM000878
ACRYSC_04470	K43816_GM000879
ACRYSC_04475	K43816_GM000880
ACRYSC_04480	K43816_GM000881
ACRYSC_04485	K43816_GM000882
ACRYSC_04490	K43816_GM000883
ACRYSC_04495	K43816_GM000884
ACRYSC_04500	K43816_GM000885
ACRYSC_04505	K43816_GM000886
ACRYSC_04510	K43816_GM000887
ACRYSC_04515	K43816_GM000888
ACRYSC_04520	K43816_GM000889
ACRYSC_04525	K43816_GM000890
ACRYSC_04530	K43816_GM000891
ACRYSC_04535	K43816_GM000892
ACRYSC_04540	K43816_GM000893
ACRYSC_04545	K43816_GM000894
ACRYSC_04550	K43816_GM000895
ACRYSC_04555	K43816_GM000896
ACRYSC_04560	K43816_GM000897
ACRYSC_04565	K43816_GM000898
ACRYSC_04570	K43816_GM000899
ACRYSC_04575	K43816_GM000900
ACRYSC_04580	K43816_GM000901
ACRYSC_04585	K43816_GM000902
ACRYSC_04590	K43816_GM000903
ACRYSC_04595	K43816_GM000904
ACRYSC_04600	K43816_GM000905
ACRYSC_04605	K43816_GM000906
ACRYSC_04610	K43816_GM000907
ACRYSC_04615	K43816_GM000908
ACRYSC_04620	K43816_GM000909
ACRYSC_04625	K43816_GM000910
ACRYSC_04630	K43816_GM000911
ACRYSC_04635	K43816_GM000912
ACRYSC_04645	K43816_GM000913
ACRYSC_04655	K43816_GM000915
ACRYSC_04660	K43816_GM000916
ACRYSC_04665	K43816_GM000917
ACRYSC_04670	K43816_GM000918
ACRYSC_04675	K43816_GM000919
ACRYSC_04680	K43816_GM000920
ACRYSC_04685	K43816_GM000921
ACRYSC_04690	K43816_GM000922
ACRYSC_04695	K43816_GM000923
ACRYSC_04700	K43816_GM000924
ACRYSC_04705	K43816_GM000925
ACRYSC_04710	K43816_GM000926
ACRYSC_04715	K43816_GM000927
ACRYSC_04720	K43816_GM000928
ACRYSC_04730	K43816_GM000930
ACRYSC_04735	K43816_GM000931
ACRYSC_04740	K43816_GM000932
ACRYSC_04750	K43816_GM000935
ACRYSC_04755	K43816_GM000936
ACRYSC_04760	K43816_GM000937
ACRYSC_04765	K43816_GM000938
ACRYSC_04770	K43816_GM000939
ACRYSC_04775	K43816_GM000940
ACRYSC_04780	K43816_GM000941
ACRYSC_04785	K43816_GM000942
ACRYSC_04790	K43816_GM000943
ACRYSC_04795	K43816_GM000944
ACRYSC_04800	K43816_GM000945
ACRYSC_04805	K43816_GM000946
ACRYSC_04810	K43816_GM000947
ACRYSC_04815	K43816_GM000948
ACRYSC_04820	K43816_GM000949
ACRYSC_04825	K43816_GM000950
ACRYSC_04830	K43816_GM000951
ACRYSC_04835	K43816_GM000952
ACRYSC_04840	K43816_GM000953
ACRYSC_04845	K43816_GM000954
ACRYSC_04850	K43816_GM000955
ACRYSC_04855	K43816_GM000956
ACRYSC_04860	K43816_GM000957
ACRYSC_04865	K43816_GM000958
ACRYSC_04870	K43816_GM000959
ACRYSC_04875	K43816_GM000960
ACRYSC_04880	K43816_GM000961
ACRYSC_04885	K43816_GM000962
ACRYSC_04890	K43816_GM000963
ACRYSC_04895	K43816_GM000964
ACRYSC_04900	K43816_GM000965
ACRYSC_04905	K43816_GM000966
ACRYSC_04910	K43816_GM000967
ACRYSC_04915	K43816_GM000968
ACRYSC_04920	K43816_GM000969
ACRYSC_04925	K43816_GM000970
ACRYSC_04930	K43816_GM000971
ACRYSC_04945	K43816_GM000972
ACRYSC_04950	K43816_GM000973
ACRYSC_04955	K43816_GM000974
ACRYSC_04960	K43816_GM000975
ACRYSC_04965	K43816_GM000976
ACRYSC_04970	K43816_GM000977
ACRYSC_04975	K43816_GM000978
ACRYSC_04980	K43816_GM000979
ACRYSC_04985	K43816_GM000980
ACRYSC_04990	K43816_GM000981
ACRYSC_04995	K43816_GM000982
ACRYSC_05000	K43816_GM000983
ACRYSC_05005	K43816_GM000984
ACRYSC_05010	K43816_GM000985
ACRYSC_05015	K43816_GM000986
ACRYSC_05020	K43816_GM000987
ACRYSC_05025	K43816_GM000988
ACRYSC_05035	K43816_GM000989
ACRYSC_05040	K43816_GM000990
ACRYSC_05045	K43816_GM000991
ACRYSC_05050	K43816_GM000992
ACRYSC_05055	K43816_GM000993
ACRYSC_05060	K43816_GM000994
ACRYSC_05065	K43816_GM000995
ACRYSC_05070	K43816_GM000996
ACRYSC_05075	K43816_GM000997
ACRYSC_05080	K43816_GM000998
ACRYSC_05085	K43816_GM000999
ACRYSC_05090	K43816_GM001000
ACRYSC_05095	K43816_GM001001
ACRYSC_05100	K43816_GM001002
ACRYSC_05105	K43816_GM001004
ACRYSC_05110	K43816_GM001005
ACRYSC_05115	K43816_GM001006
ACRYSC_05120	K43816_GM001007
ACRYSC_05125	K43816_GM001008
ACRYSC_05130	K43816_GM001009
ACRYSC_05135	K43816_GM001010
ACRYSC_05140	K43816_GM001011
ACRYSC_05145	K43816_GM001012
ACRYSC_05150	K43816_GM001013
ACRYSC_05155	K43816_GM001014
ACRYSC_05160	K43816_GM001015
ACRYSC_05165	K43816_GM001016
ACRYSC_05170	K43816_GM001017
ACRYSC_05175	K43816_GM001018
ACRYSC_05180	K43816_GM001019
ACRYSC_05190	K43816_GM001021
ACRYSC_05195	K43816_GM001022
ACRYSC_05200	K43816_GM001023
ACRYSC_05205	K43816_GM001024
ACRYSC_05210	K43816_GM001025
ACRYSC_05215	K43816_GM001026
ACRYSC_05220	K43816_GM001027
ACRYSC_05225	K43816_GM001028
ACRYSC_05230	K43816_GM001029
ACRYSC_05235	K43816_GM001030
ACRYSC_05240	K43816_GM001031
ACRYSC_05245	K43816_GM001032
ACRYSC_05255	K43816_GM001034
ACRYSC_05260	K43816_GM001035
ACRYSC_05265	K43816_GM001036
ACRYSC_05270	K43816_GM001037
ACRYSC_05275	K43816_GM001038
ACRYSC_05280	K43816_GM001039
ACRYSC_05285	K43816_GM001040
ACRYSC_05290	K43816_GM001041
ACRYSC_05295	K43816_GM001042
ACRYSC_05300	K43816_GM001043
ACRYSC_05305	K43816_GM001044
ACRYSC_05310	K43816_GM001045
ACRYSC_05315	K43816_GM001046
ACRYSC_05320	K43816_GM001047
ACRYSC_05325	K43816_GM001048
ACRYSC_05330	K43816_GM001049
ACRYSC_05335	K43816_GM001050
ACRYSC_05340	K43816_GM001051
ACRYSC_05345	K43816_GM001052
ACRYSC_05350	K43816_GM001053
ACRYSC_05355	K43816_GM001054
ACRYSC_05360	K43816_GM001055
ACRYSC_05365	K43816_GM001056
ACRYSC_05370	K43816_GM001057
ACRYSC_05375	K43816_GM001058
ACRYSC_05380	K43816_GM001059
ACRYSC_05385	K43816_GM001060
ACRYSC_05390	K43816_GM001061
ACRYSC_05395	K43816_GM001062
ACRYSC_05400	K43816_GM001063
ACRYSC_05405	K43816_GM001064
ACRYSC_05410	K43816_GM001065
ACRYSC_05415	K43816_GM001066
ACRYSC_05420	K43816_GM001067
ACRYSC_05425	K43816_GM001068
ACRYSC_05430	K43816_GM001069
ACRYSC_05435	K43816_GM001070
ACRYSC_05440	K43816_GM001071
ACRYSC_05445	K43816_GM001072
ACRYSC_05450	K43816_GM001073
ACRYSC_05455	K43816_GM001074
ACRYSC_05460	K43816_GM001075
ACRYSC_05465	K43816_GM001076
ACRYSC_05470	K43816_GM001077
ACRYSC_05475	K43816_GM001078
ACRYSC_05480	K43816_GM001079
ACRYSC_05485	K43816_GM001080
ACRYSC_05490	K43816_GM001081
ACRYSC_05495	K43816_GM001082
ACRYSC_05500	K43816_GM001083
ACRYSC_05505	K43816_GM001084
ACRYSC_05510	K43816_GM001085
ACRYSC_05515	K43816_GM001086
ACRYSC_05520	K43816_GM001087
ACRYSC_05525	K43816_GM001088
ACRYSC_05530	K43816_GM001089
ACRYSC_05535	K43816_GM001090
ACRYSC_05540	K43816_GM001091
ACRYSC_05545	K43816_GM001092
ACRYSC_05550	K43816_GM001093
ACRYSC_05555	K43816_GM001094
ACRYSC_05560	K43816_GM001095
ACRYSC_05565	K43816_GM001096
ACRYSC_05570	K43816_GM001097
ACRYSC_05575	K43816_GM001098
ACRYSC_05580	K43816_GM001099
ACRYSC_05585	K43816_GM001100
ACRYSC_05590	K43816_GM001101
ACRYSC_05600	K43816_GM001103
ACRYSC_05605	K43816_GM001104
ACRYSC_05610	K43816_GM001105
ACRYSC_05615	K43816_GM001106
ACRYSC_05620	K43816_GM001107
ACRYSC_05625	K43816_GM001108
ACRYSC_05630	K43816_GM001109
ACRYSC_05635	K43816_GM001110
ACRYSC_05665	K43816_GM001112
ACRYSC_05670	K43816_GM001113
ACRYSC_05680	K43816_GM001115
ACRYSC_05685	K43816_GM001116
ACRYSC_05690	K43816_GM001117
ACRYSC_05695	K43816_GM001118
ACRYSC_05700	K43816_GM001119
ACRYSC_05705	K43816_GM001120
ACRYSC_05710	K43816_GM001121
ACRYSC_05715	K43816_GM001122
ACRYSC_05720	K43816_GM001123
ACRYSC_05725	K43816_GM001124
ACRYSC_05730	K43816_GM001125
ACRYSC_05735	K43816_GM001126
ACRYSC_05740	K43816_GM001127
ACRYSC_05750	K43816_GM001130
ACRYSC_05755	K43816_GM001131
ACRYSC_05760	K43816_GM001132
ACRYSC_05770	K43816_GM001136
ACRYSC_05775	K43816_GM001137
ACRYSC_05780	K43816_GM001138
ACRYSC_05785	K43816_GM001140
ACRYSC_05790	K43816_GM001141
ACRYSC_05795	K43816_GM001142
ACRYSC_05800	K43816_GM001143
ACRYSC_05805	K43816_GM001144
ACRYSC_05810	K43816_GM001145
ACRYSC_05815	K43816_GM001146
ACRYSC_05820	K43816_GM001147
ACRYSC_05825	K43816_GM001148
ACRYSC_05835	K43816_GM001150
ACRYSC_05845	K43816_GM001152
ACRYSC_05850	K43816_GM001153
ACRYSC_05855	K43816_GM001154
ACRYSC_05860	K43816_GM001155
ACRYSC_05865	K43816_GM001156
ACRYSC_05870	K43816_GM001157
ACRYSC_05875	K43816_GM001158
ACRYSC_05880	K43816_GM001159
ACRYSC_05885	K43816_GM001160
ACRYSC_05890	K43816_GM001161
ACRYSC_05895	K43816_GM001162
ACRYSC_05900	K43816_GM001163
ACRYSC_05905	K43816_GM001164
ACRYSC_05910	K43816_GM001165
ACRYSC_05915	K43816_GM001166
ACRYSC_05920	K43816_GM001167
ACRYSC_05925	K43816_GM001168
ACRYSC_05930	K43816_GM001169
ACRYSC_05935	K43816_GM001170
ACRYSC_05940	K43816_GM001171
ACRYSC_05945	K43816_GM001172
ACRYSC_05950	K43816_GM001173
ACRYSC_05955	K43816_GM001175
ACRYSC_05960	K43816_GM001176
ACRYSC_05970	K43816_GM001177
ACRYSC_05975	K43816_GM001178
ACRYSC_05980	K43816_GM001179
ACRYSC_05985	K43816_GM001180
ACRYSC_05990	K43816_GM001181
ACRYSC_05995	K43816_GM001182
ACRYSC_06000	K43816_GM001183
ACRYSC_06005	K43816_GM001184
ACRYSC_06010	K43816_GM001185
ACRYSC_06015	K43816_GM001186
ACRYSC_06020	K43816_GM001187
ACRYSC_06025	K43816_GM001188
ACRYSC_06030	K43816_GM001189
ACRYSC_06040	K43816_GM001191
ACRYSC_06045	K43816_GM001192
ACRYSC_06050	K43816_GM001193
ACRYSC_06055	K43816_GM001194
ACRYSC_06065	K43816_GM001196
ACRYSC_06070	K43816_GM001197
ACRYSC_06075	K43816_GM001198
ACRYSC_06080	K43816_GM001199
ACRYSC_06090	K43816_GM001200
ACRYSC_06095	K43816_GM001201
ACRYSC_06100	K43816_GM001202
ACRYSC_06105	K43816_GM001203
ACRYSC_06110	K43816_GM001205
ACRYSC_06135	K43816_GM001207
ACRYSC_06140	K43816_GM001208
ACRYSC_06145	K43816_GM001209
ACRYSC_06150	K43816_GM001210
ACRYSC_06155	K43816_GM001211
ACRYSC_06160	K43816_GM001212
ACRYSC_06165	K43816_GM001213
ACRYSC_06170	K43816_GM001214
ACRYSC_06175	K43816_GM001215
ACRYSC_06180	K43816_GM001216
ACRYSC_06185	K43816_GM001217
ACRYSC_06200	K43816_GM001219
ACRYSC_06205	K43816_GM001220
ACRYSC_06210	K43816_GM001221
ACRYSC_06215	K43816_GM001222
ACRYSC_06220	K43816_GM001223
ACRYSC_06225	K43816_GM001224
ACRYSC_06230	K43816_GM001225
ACRYSC_06235	K43816_GM001226
ACRYSC_06240	K43816_GM001227
ACRYSC_06245	K43816_GM001228
ACRYSC_06250	K43816_GM001229
ACRYSC_06255	K43816_GM001230
ACRYSC_06260	K43816_GM001231
ACRYSC_06275	K43816_GM001234
ACRYSC_06280	K43816_GM001236
ACRYSC_06285	K43816_GM001237
ACRYSC_06290	K43816_GM001238
ACRYSC_06295	K43816_GM001239
ACRYSC_06300	K43816_GM001240
ACRYSC_06305	K43816_GM001241
ACRYSC_06310	K43816_GM001242
ACRYSC_06315	K43816_GM001243
ACRYSC_06320	K43816_GM001244
ACRYSC_06325	K43816_GM001245
ACRYSC_06330	K43816_GM001246
ACRYSC_06335	K43816_GM001247
ACRYSC_06340	K43816_GM001248
ACRYSC_06345	K43816_GM001249
ACRYSC_06350	K43816_GM001250
ACRYSC_06355	K43816_GM001251
ACRYSC_06360	K43816_GM001252
ACRYSC_06365	K43816_GM001253
ACRYSC_06370	K43816_GM001254
ACRYSC_06375	K43816_GM001255
ACRYSC_06380	K43816_GM001256
ACRYSC_06385	K43816_GM001257
ACRYSC_06390	K43816_GM001258
ACRYSC_06395	K43816_GM001259
ACRYSC_06400	K43816_GM001260
ACRYSC_06405	K43816_GM001261
ACRYSC_06410	K43816_GM001262
ACRYSC_06415	K43816_GM001263
ACRYSC_06420	K43816_GM001264
ACRYSC_06425	K43816_GM001265
ACRYSC_06430	K43816_GM001266
ACRYSC_06435	K43816_GM001267
ACRYSC_06440	K43816_GM001268
ACRYSC_06445	K43816_GM001269
ACRYSC_06450	K43816_GM001270
ACRYSC_06455	K43816_GM001272
ACRYSC_06460	K43816_GM001273
ACRYSC_06465	K43816_GM001274
ACRYSC_06470	K43816_GM001275
ACRYSC_06475	K43816_GM001276
ACRYSC_06480	K43816_GM001277
ACRYSC_06485	K43816_GM001279
ACRYSC_06490	K43816_GM001281
ACRYSC_06495	K43816_GM001282
ACRYSC_06500	K43816_GM001283
ACRYSC_06505	K43816_GM001284
ACRYSC_06510	K43816_GM001285
ACRYSC_06515	K43816_GM001286
ACRYSC_06520	K43816_GM001287
ACRYSC_06525	K43816_GM001288
ACRYSC_06530	K43816_GM001289
ACRYSC_06540	K43816_GM001290
ACRYSC_06555	K43816_GM001291
ACRYSC_06570	K43816_GM001293
ACRYSC_06575	K43816_GM001294
ACRYSC_06580	K43816_GM001295
ACRYSC_06585	K43816_GM001296
ACRYSC_06590	K43816_GM001297
ACRYSC_06595	K43816_GM001298
ACRYSC_06600	K43816_GM001300
ACRYSC_06605	K43816_GM001301
ACRYSC_06610	K43816_GM001302
ACRYSC_06615	K43816_GM001303
ACRYSC_06620	K43816_GM001304
ACRYSC_06625	K43816_GM001305
ACRYSC_06630	K43816_GM001306
ACRYSC_06635	K43816_GM001307
ACRYSC_06640	K43816_GM001308
ACRYSC_06645	K43816_GM001309
ACRYSC_06650	K43816_GM001310
ACRYSC_06655	K43816_GM001311
ACRYSC_06665	K43816_GM001313
ACRYSC_06670	K43816_GM001314
ACRYSC_06675	K43816_GM001315
ACRYSC_06680	K43816_GM001316
ACRYSC_06685	K43816_GM001317
ACRYSC_06690	K43816_GM001318
ACRYSC_06695	K43816_GM001319
ACRYSC_06700	K43816_GM001320
ACRYSC_06705	K43816_GM001321
ACRYSC_06710	K43816_GM001322
ACRYSC_06715	K43816_GM001323
ACRYSC_06720	K43816_GM001324
ACRYSC_06725	K43816_GM001325
ACRYSC_06730	K43816_GM001326
ACRYSC_06735	K43816_GM001327
ACRYSC_06740	K43816_GM001328
ACRYSC_06750	K43816_GM001329
ACRYSC_06755	K43816_GM001330
ACRYSC_06760	K43816_GM001331
ACRYSC_06765	K43816_GM001332
ACRYSC_06770	K43816_GM001333
ACRYSC_06775	K43816_GM001334
ACRYSC_06780	K43816_GM001335
ACRYSC_06785	K43816_GM001336
ACRYSC_06790	K43816_GM001337
ACRYSC_06795	K43816_GM001338
ACRYSC_06800	K43816_GM001339
ACRYSC_06805	K43816_GM001340
ACRYSC_06810	K43816_GM001341
ACRYSC_06815	K43816_GM001342
ACRYSC_06820	K43816_GM001343
ACRYSC_06825	K43816_GM001344
ACRYSC_06830	K43816_GM001345
ACRYSC_06835	K43816_GM001346
ACRYSC_06840	K43816_GM001347
ACRYSC_06845	K43816_GM001348
ACRYSC_06850	K43816_GM001349
ACRYSC_06855	K43816_GM001350
ACRYSC_06860	K43816_GM001351
ACRYSC_06865	K43816_GM001352
ACRYSC_06870	K43816_GM001353
ACRYSC_06875	K43816_GM001354
ACRYSC_06880	K43816_GM001355
ACRYSC_06885	K43816_GM001356
ACRYSC_06890	K43816_GM001357
ACRYSC_06895	K43816_GM001358
ACRYSC_06905	K43816_GM001359
ACRYSC_06910	K43816_GM001360
ACRYSC_06915	K43816_GM001361
ACRYSC_06920	K43816_GM001362
ACRYSC_06925	K43816_GM001363
ACRYSC_06930	K43816_GM001364
ACRYSC_06935	K43816_GM001365
ACRYSC_06940	K43816_GM001366
ACRYSC_06945	K43816_GM001367
ACRYSC_06950	K43816_GM001368
ACRYSC_06955	K43816_GM001369
ACRYSC_06960	K43816_GM001370
ACRYSC_06965	K43816_GM001372
ACRYSC_06970	K43816_GM001373
ACRYSC_06975	K43816_GM001374
ACRYSC_06980	K43816_GM001375
ACRYSC_06985	K43816_GM001376
ACRYSC_06990	K43816_GM001377
ACRYSC_06995	K43816_GM001378
ACRYSC_07020	K43816_GM001379
ACRYSC_07025	K43816_GM001380
ACRYSC_07030	K43816_GM001381
ACRYSC_07045	K43816_GM001383
ACRYSC_07050	K43816_GM001384
ACRYSC_07055	K43816_GM001385
ACRYSC_07060	K43816_GM001386
ACRYSC_07065	K43816_GM001387
ACRYSC_07070	K43816_GM001388
ACRYSC_07075	K43816_GM001389
ACRYSC_07080	K43816_GM001390
ACRYSC_07085	K43816_GM001391
ACRYSC_07090	K43816_GM001392
ACRYSC_07095	K43816_GM001393
ACRYSC_07105	K43816_GM001394
ACRYSC_07115	K43816_GM001395
ACRYSC_07120	K43816_GM001396
ACRYSC_07125	K43816_GM001397
ACRYSC_07130	K43816_GM001398
ACRYSC_07135	K43816_GM001400
ACRYSC_07145	K43816_GM001401
ACRYSC_07150	K43816_GM001402
ACRYSC_07155	K43816_GM001403
ACRYSC_07160	K43816_GM001404
ACRYSC_07165	K43816_GM001405
ACRYSC_07170	K43816_GM001406
ACRYSC_07175	K43816_GM001407
ACRYSC_07180	K43816_GM001408
ACRYSC_07190	K43816_GM001410
ACRYSC_07195	K43816_GM001411
ACRYSC_07200	K43816_GM001412
ACRYSC_07205	K43816_GM001413
ACRYSC_07210	K43816_GM001414
ACRYSC_07215	K43816_GM001415
ACRYSC_07220	K43816_GM001417
ACRYSC_07225	K43816_GM001418
ACRYSC_07230	K43816_GM001419
ACRYSC_07235	K43816_GM001420
ACRYSC_07240	K43816_GM001421
ACRYSC_07245	K43816_GM001422
ACRYSC_07250	K43816_GM001423
ACRYSC_07255	K43816_GM001424
ACRYSC_07260	K43816_GM001425
ACRYSC_07265	K43816_GM001426
ACRYSC_07270	K43816_GM001427
ACRYSC_07275	K43816_GM001428
ACRYSC_07280	K43816_GM001429
ACRYSC_07285	K43816_GM001430
ACRYSC_07290	K43816_GM001431
ACRYSC_07295	K43816_GM001432
ACRYSC_07300	K43816_GM001433
ACRYSC_07305	K43816_GM001434
ACRYSC_07310	K43816_GM001435
ACRYSC_07315	K43816_GM001436
ACRYSC_07325	K43816_GM001437
ACRYSC_07330	K43816_GM001438
ACRYSC_07335	K43816_GM001439
ACRYSC_07340	K43816_GM001440
ACRYSC_07345	K43816_GM001441
ACRYSC_07350	K43816_GM001442
ACRYSC_07355	K43816_GM001443
ACRYSC_07360	K43816_GM001444
ACRYSC_07365	K43816_GM001445
ACRYSC_07370	K43816_GM001446
ACRYSC_07375	K43816_GM001447
ACRYSC_07380	K43816_GM001448
ACRYSC_07385	K43816_GM001449
ACRYSC_07390	K43816_GM001450
ACRYSC_07395	K43816_GM001451
ACRYSC_07400	K43816_GM001452
ACRYSC_07405	K43816_GM001453
ACRYSC_07410	K43816_GM001454
ACRYSC_07415	K43816_GM001455
ACRYSC_07420	K43816_GM001456
ACRYSC_07425	K43816_GM001457
ACRYSC_07430	K43816_GM001458
ACRYSC_07435	K43816_GM001459
ACRYSC_07440	K43816_GM001460
ACRYSC_07445	K43816_GM001461
ACRYSC_07450	K43816_GM001462
ACRYSC_07455	K43816_GM001463
ACRYSC_07460	K43816_GM001464
ACRYSC_07465	K43816_GM001465
ACRYSC_07470	K43816_GM001466
ACRYSC_07480	K43816_GM001468
ACRYSC_07485	K43816_GM001469
ACRYSC_07490	K43816_GM001470
ACRYSC_07495	K43816_GM001471
ACRYSC_07500	K43816_GM001472
ACRYSC_07505	K43816_GM001473
ACRYSC_07510	K43816_GM001474
ACRYSC_07515	K43816_GM001475
ACRYSC_07520	K43816_GM001476
ACRYSC_07525	K43816_GM001477
ACRYSC_07530	K43816_GM001478
ACRYSC_07535	K43816_GM001479
ACRYSC_07540	K43816_GM001480
ACRYSC_07545	K43816_GM001481
ACRYSC_07550	K43816_GM001482
ACRYSC_07555	K43816_GM001483
ACRYSC_07560	K43816_GM001484
ACRYSC_07565	K43816_GM001485
ACRYSC_07570	K43816_GM001486
ACRYSC_07575	K43816_GM001487
ACRYSC_07580	K43816_GM001488
ACRYSC_07585	K43816_GM001489
ACRYSC_07590	K43816_GM001490
ACRYSC_07600	K43816_GM001493
ACRYSC_07605	K43816_GM001494
ACRYSC_07610	K43816_GM001495
ACRYSC_07625	K43816_GM001497
ACRYSC_07630	K43816_GM001498
ACRYSC_07635	K43816_GM001499
ACRYSC_07640	K43816_GM001500
ACRYSC_07645	K43816_GM001501
ACRYSC_07650	K43816_GM001502
ACRYSC_07655	K43816_GM001503
ACRYSC_07660	K43816_GM001504
ACRYSC_07665	K43816_GM001505
ACRYSC_07670	K43816_GM001506
ACRYSC_07675	K43816_GM001507
ACRYSC_07680	K43816_GM001508
ACRYSC_07685	K43816_GM001509
ACRYSC_07695	K43816_GM001510
ACRYSC_07700	K43816_GM001511
ACRYSC_07705	K43816_GM001512
ACRYSC_07710	K43816_GM001513
ACRYSC_07715	K43816_GM001514
ACRYSC_07725	K43816_GM001516
ACRYSC_07730	K43816_GM001517
ACRYSC_07735	K43816_GM001518
ACRYSC_07740	K43816_GM001519
ACRYSC_07745	K43816_GM001520
ACRYSC_07750	K43816_GM001521
ACRYSC_07755	K43816_GM001522
ACRYSC_07760	K43816_GM001523
ACRYSC_07765	K43816_GM001524
ACRYSC_07770	K43816_GM001525
ACRYSC_07775	K43816_GM001526
ACRYSC_07780	K43816_GM001527
ACRYSC_07785	K43816_GM001528
ACRYSC_07795	K43816_GM001530
ACRYSC_07800	K43816_GM001531
ACRYSC_07805	K43816_GM001532
ACRYSC_07815	K43816_GM001533
ACRYSC_07825	K43816_GM001535
ACRYSC_07830	K43816_GM001537
ACRYSC_07835	K43816_GM001538
ACRYSC_07840	K43816_GM001539
ACRYSC_07845	K43816_GM001540
ACRYSC_07850	K43816_GM001541
ACRYSC_07855	K43816_GM001542
ACRYSC_07860	K43816_GM001543
ACRYSC_07870	K43816_GM001545
ACRYSC_07875	K43816_GM001546
ACRYSC_07880	K43816_GM001547
ACRYSC_07885	K43816_GM001548
ACRYSC_07890	K43816_GM001549
ACRYSC_07895	K43816_GM001550
ACRYSC_07900	K43816_GM001551
ACRYSC_07905	K43816_GM001552
ACRYSC_07915	K43816_GM001554
ACRYSC_07920	K43816_GM001555
ACRYSC_07925	K43816_GM001556
ACRYSC_07930	K43816_GM001557
ACRYSC_07935	K43816_GM001558
ACRYSC_07945	K43816_GM001560
ACRYSC_07950	K43816_GM001562
ACRYSC_07955	K43816_GM001563
ACRYSC_07960	K43816_GM001564
ACRYSC_07965	K43816_GM001565
ACRYSC_07970	K43816_GM001566
ACRYSC_07975	K43816_GM001567
ACRYSC_07980	K43816_GM001568
ACRYSC_07985	K43816_GM001569
ACRYSC_07990	K43816_GM001570
ACRYSC_07995	K43816_GM001571
ACRYSC_08000	K43816_GM001572
ACRYSC_08005	K43816_GM001573
ACRYSC_08010	K43816_GM001574
ACRYSC_08015	K43816_GM001575
ACRYSC_08020	K43816_GM001576
ACRYSC_08025	K43816_GM001577
ACRYSC_08030	K43816_GM001578
ACRYSC_08035	K43816_GM001579
ACRYSC_08040	K43816_GM001580
ACRYSC_08045	K43816_GM001581
ACRYSC_08050	K43816_GM001582
ACRYSC_08055	K43816_GM001583
ACRYSC_08060	K43816_GM001584
ACRYSC_08065	K43816_GM001585
ACRYSC_08070	K43816_GM001586
ACRYSC_08075	K43816_GM001587
ACRYSC_08080	K43816_GM001588
ACRYSC_08085	K43816_GM001589
ACRYSC_08090	K43816_GM001590
ACRYSC_08095	K43816_GM001591
ACRYSC_08100	K43816_GM001592
ACRYSC_08105	K43816_GM001593
ACRYSC_08110	K43816_GM001594
ACRYSC_08115	K43816_GM001595
ACRYSC_08120	K43816_GM001596
ACRYSC_08125	K43816_GM001597
ACRYSC_08130	K43816_GM001598
ACRYSC_08135	K43816_GM001599
ACRYSC_08140	K43816_GM001600
ACRYSC_08145	K43816_GM001601
ACRYSC_08150	K43816_GM001602
ACRYSC_08155	K43816_GM001603
ACRYSC_08160	K43816_GM001604
ACRYSC_08165	K43816_GM001605
ACRYSC_08170	K43816_GM001606
ACRYSC_08175	K43816_GM001607
ACRYSC_08180	K43816_GM001608
ACRYSC_08185	K43816_GM001609
ACRYSC_08190	K43816_GM001610
ACRYSC_08195	K43816_GM001611
ACRYSC_08200	K43816_GM001612
ACRYSC_08205	K43816_GM001613
ACRYSC_08210	K43816_GM001614
ACRYSC_08215	K43816_GM001615
ACRYSC_08225	K43816_GM001616
ACRYSC_08230	K43816_GM001617
ACRYSC_08235	K43816_GM001618
ACRYSC_08240	K43816_GM001619
ACRYSC_08245	K43816_GM001620
ACRYSC_08250	K43816_GM001621
ACRYSC_08255	K43816_GM001622
ACRYSC_08260	K43816_GM001623
ACRYSC_08270	K43816_GM001625
ACRYSC_08280	K43816_GM001626
ACRYSC_08285	K43816_GM001627
ACRYSC_08290	K43816_GM001629
ACRYSC_08295	K43816_GM001630
ACRYSC_08300	K43816_GM001632
ACRYSC_08305	K43816_GM001633
ACRYSC_08310	K43816_GM001634
ACRYSC_08315	K43816_GM001635
ACRYSC_08320	K43816_GM001636
ACRYSC_08340	K43816_GM001640
ACRYSC_08345	K43816_GM001641
ACRYSC_08350	K43816_GM001642
ACRYSC_08355	K43816_GM001643
ACRYSC_08365	K43816_GM001644
ACRYSC_08370	K43816_GM001645
ACRYSC_08375	K43816_GM001646
ACRYSC_08380	K43816_GM001647
ACRYSC_08385	K43816_GM001648
ACRYSC_08390	K43816_GM001649
ACRYSC_08395	K43816_GM001650
ACRYSC_08400	K43816_GM001651
ACRYSC_08405	K43816_GM001652
ACRYSC_08410	K43816_GM001653
ACRYSC_08415	K43816_GM001654
ACRYSC_08420	K43816_GM001655
ACRYSC_08425	K43816_GM001656
ACRYSC_08430	K43816_GM001657
ACRYSC_08435	K43816_GM001658
ACRYSC_08440	K43816_GM001659
ACRYSC_08450	K43816_GM001660
ACRYSC_08455	K43816_GM001661
ACRYSC_08465	K43816_GM001662
ACRYSC_08470	K43816_GM001663
ACRYSC_08475	K43816_GM001664
ACRYSC_08480	K43816_GM001665
ACRYSC_08490	K43816_GM001667
ACRYSC_08495	K43816_GM001668
ACRYSC_08500	K43816_GM001669
ACRYSC_08505	K43816_GM001670
ACRYSC_08510	K43816_GM001671
ACRYSC_08515	K43816_GM001672
ACRYSC_08520	K43816_GM001673
ACRYSC_08525	K43816_GM001674
ACRYSC_08530	K43816_GM001675
ACRYSC_08535	K43816_GM001676
ACRYSC_08540	K43816_GM001677
ACRYSC_08545	K43816_GM001678
ACRYSC_08550	K43816_GM001679
ACRYSC_08560	K43816_GM001680
ACRYSC_08565	K43816_GM001681
ACRYSC_08570	K43816_GM001682
ACRYSC_08575	K43816_GM001683
ACRYSC_08580	K43816_GM001684
ACRYSC_08585	K43816_GM001685
ACRYSC_08590	K43816_GM001686
ACRYSC_08595	K43816_GM001688
ACRYSC_08600	K43816_GM001689
ACRYSC_08605	K43816_GM001690
ACRYSC_08610	K43816_GM001691
ACRYSC_08620	K43816_GM001692
ACRYSC_08625	K43816_GM001693
ACRYSC_08630	K43816_GM001694
ACRYSC_08635	K43816_GM001695
ACRYSC_08640	K43816_GM001696
ACRYSC_08655	K43816_GM001697
ACRYSC_08660	K43816_GM001698
ACRYSC_08665	K43816_GM001699
ACRYSC_08670	K43816_GM001700
ACRYSC_08675	K43816_GM001701
ACRYSC_08685	K43816_GM001703
ACRYSC_08690	K43816_GM001704
ACRYSC_08695	K43816_GM001705
ACRYSC_08705	K43816_GM001707
ACRYSC_08720	K43816_GM001711
ACRYSC_08740	K43816_GM001714
ACRYSC_08745	K43816_GM001715
ACRYSC_08755	K43816_GM001716
ACRYSC_08760	K43816_GM001717
ACRYSC_08765	K43816_GM001718
ACRYSC_08775	K43816_GM001719
ACRYSC_08780	K43816_GM001720
ACRYSC_08785	K43816_GM001721
ACRYSC_08790	K43816_GM001722
ACRYSC_08795	K43816_GM001723
ACRYSC_08810	K43816_GM001727
ACRYSC_08820	K43816_GM001728
ACRYSC_08835	K43816_GM001729
ACRYSC_08845	K43816_GM001732
ACRYSC_08850	K43816_GM001733
ACRYSC_08855	K43816_GM001734
ACRYSC_08860	K43816_GM001735
ACRYSC_08865	K43816_GM001736
ACRYSC_08870	K43816_GM001737
ACRYSC_08875	K43816_GM001738
ACRYSC_08880	K43816_GM001739
ACRYSC_08885	K43816_GM001740
ACRYSC_08890	K43816_GM001741
ACRYSC_08895	K43816_GM001742
ACRYSC_08910	K43816_GM001743
ACRYSC_08920	K43816_GM001744
ACRYSC_08925	K43816_GM001745
ACRYSC_08930	K43816_GM001746
ACRYSC_08935	K43816_GM001747
ACRYSC_08950	K43816_GM001750
ACRYSC_08960	K43816_GM001751
ACRYSC_08965	K43816_GM001752
ACRYSC_08970	K43816_GM001753
ACRYSC_08975	K43816_GM001755
ACRYSC_08985	K43816_GM001756
ACRYSC_08995	K43816_GM001757
ACRYSC_09000	K43816_GM001758
ACRYSC_09005	K43816_GM001759
ACRYSC_09010	K43816_GM001760
ACRYSC_09015	K43816_GM001761
ACRYSC_09025	K43816_GM001763
ACRYSC_09030	K43816_GM001764
ACRYSC_09035	K43816_GM001765
ACRYSC_09040	K43816_GM001766
ACRYSC_09045	K43816_GM001767
ACRYSC_09050	K43816_GM001768
ACRYSC_09060	K43816_GM001769
ACRYSC_09070	K43816_GM001772
ACRYSC_09075	K43816_GM001773
ACRYSC_09085	K43816_GM001775
ACRYSC_09090	K43816_GM001776
ACRYSC_09095	K43816_GM001777
ACRYSC_09100	K43816_GM001778
ACRYSC_09105	K43816_GM001779
ACRYSC_09110	K43816_GM001780
ACRYSC_09115	K43816_GM001781
ACRYSC_09120	K43816_GM001782
ACRYSC_09125	K43816_GM001783
ACRYSC_09130	K43816_GM001784
ACRYSC_09135	K43816_GM001785
ACRYSC_09140	K43816_GM001786
ACRYSC_09145	K43816_GM001787
ACRYSC_09150	K43816_GM001788
ACRYSC_09155	K43816_GM001789
ACRYSC_09160	K43816_GM001790
ACRYSC_09165	K43816_GM001791
ACRYSC_09175	K43816_GM001792
ACRYSC_09180	K43816_GM001793
ACRYSC_09185	K43816_GM001794
ACRYSC_09190	K43816_GM001795
ACRYSC_09195	K43816_GM001796
ACRYSC_09200	K43816_GM001797
ACRYSC_09205	K43816_GM001798
ACRYSC_09210	K43816_GM001799
ACRYSC_09215	K43816_GM001800
ACRYSC_09220	K43816_GM001801
ACRYSC_09225	K43816_GM001802
ACRYSC_09230	K43816_GM001803
ACRYSC_09235	K43816_GM001804
ACRYSC_09240	K43816_GM001805
ACRYSC_09245	K43816_GM001806
ACRYSC_09250	K43816_GM001807
ACRYSC_09255	K43816_GM001808
ACRYSC_09260	K43816_GM001809
ACRYSC_09275	K43816_GM001811
ACRYSC_09280	K43816_GM001812
ACRYSC_09285	K43816_GM001813
ACRYSC_09290	K43816_GM001814
ACRYSC_09295	K43816_GM001815
ACRYSC_09305	K43816_GM001817
ACRYSC_09310	K43816_GM001818
ACRYSC_09315	K43816_GM001819
ACRYSC_09320	K43816_GM001820
ACRYSC_09325	K43816_GM001821
ACRYSC_09330	K43816_GM001822
ACRYSC_09335	K43816_GM001823
ACRYSC_09340	K43816_GM001824
ACRYSC_09345	K43816_GM001825
ACRYSC_09350	K43816_GM001826
ACRYSC_09355	K43816_GM001827
ACRYSC_09360	K43816_GM001828
ACRYSC_09365	K43816_GM001829
ACRYSC_09370	K43816_GM001830
ACRYSC_09375	K43816_GM001831
ACRYSC_09380	K43816_GM001832
ACRYSC_09385	K43816_GM001833
ACRYSC_09390	K43816_GM001834
ACRYSC_09415	K43816_GM001836
ACRYSC_09420	K43816_GM001837
ACRYSC_09425	K43816_GM001838
ACRYSC_09430	K43816_GM001839
ACRYSC_09440	K43816_GM001841
ACRYSC_09445	K43816_GM001842
ACRYSC_09450	K43816_GM001843
ACRYSC_09455	K43816_GM001844
ACRYSC_09465	K43816_GM001845
ACRYSC_09475	K43816_GM001847
ACRYSC_09480	K43816_GM001848
ACRYSC_09485	K43816_GM001849
ACRYSC_09490	K43816_GM001850
ACRYSC_09495	K43816_GM001851
ACRYSC_09500	K43816_GM001852
ACRYSC_09505	K43816_GM001853
ACRYSC_09510	K43816_GM001854
ACRYSC_09515	K43816_GM001855
ACRYSC_09520	K43816_GM001856
ACRYSC_09525	K43816_GM001857
ACRYSC_09530	K43816_GM001858
ACRYSC_09535	K43816_GM001859
ACRYSC_09540	K43816_GM001860
ACRYSC_09545	K43816_GM001861
ACRYSC_09550	K43816_GM001862
ACRYSC_09555	K43816_GM001863
ACRYSC_09560	K43816_GM001864
ACRYSC_09565	K43816_GM001865
ACRYSC_09570	K43816_GM001866
ACRYSC_09575	K43816_GM001867
ACRYSC_09580	K43816_GM001868
ACRYSC_09585	K43816_GM001869
ACRYSC_09600	K43816_GM001872
ACRYSC_09605	K43816_GM001873
ACRYSC_09610	K43816_GM001874
ACRYSC_09615	K43816_GM001875
ACRYSC_09625	K43816_GM001876
ACRYSC_09630	K43816_GM001877
ACRYSC_09635	K43816_GM001878
ACRYSC_09640	K43816_GM001879
ACRYSC_09645	K43816_GM001880
ACRYSC_09650	K43816_GM001881
ACRYSC_09655	K43816_GM001882
ACRYSC_09660	K43816_GM001883
ACRYSC_09665	K43816_GM001884
ACRYSC_09670	K43816_GM001885
ACRYSC_09675	K43816_GM001886
ACRYSC_09680	K43816_GM001887
ACRYSC_09685	K43816_GM001888
ACRYSC_09690	K43816_GM001889
ACRYSC_09695	K43816_GM001890
ACRYSC_09700	K43816_GM001891
ACRYSC_09705	K43816_GM001892
ACRYSC_09710	K43816_GM001894
ACRYSC_09715	K43816_GM001895
ACRYSC_09720	K43816_GM001896
ACRYSC_09730	K43816_GM001898
ACRYSC_09735	K43816_GM001899
ACRYSC_09740	K43816_GM001900
ACRYSC_09745	K43816_GM001901
ACRYSC_09765	K43816_GM001905
ACRYSC_09775	K43816_GM001906
ACRYSC_09780	K43816_GM001907
ACRYSC_09785	K43816_GM001908
ACRYSC_09790	K43816_GM001909
ACRYSC_09795	K43816_GM001910
ACRYSC_09800	K43816_GM001911
ACRYSC_09805	K43816_GM001912
ACRYSC_09810	K43816_GM001913
ACRYSC_09815	K43816_GM001914
ACRYSC_09820	K43816_GM001915
ACRYSC_09825	K43816_GM001916
ACRYSC_09830	K43816_GM001917
ACRYSC_09835	K43816_GM001918
ACRYSC_09840	K43816_GM001919
ACRYSC_09845	K43816_GM001920
ACRYSC_09850	K43816_GM001921
ACRYSC_09855	K43816_GM001922
ACRYSC_09860	K43816_GM001923
ACRYSC_09870	K43816_GM001925
ACRYSC_09875	K43816_GM001926
ACRYSC_09880	K43816_GM001927
ACRYSC_09890	K43816_GM001929
ACRYSC_09895	K43816_GM001930
ACRYSC_09900	K43816_GM001931
ACRYSC_09905	K43816_GM001932
ACRYSC_09910	K43816_GM001933
ACRYSC_09920	K43816_GM001935
ACRYSC_09925	K43816_GM001936
ACRYSC_09930	K43816_GM001937
ACRYSC_09945	K43816_GM001939
ACRYSC_09955	K43816_GM001941
ACRYSC_09960	K43816_GM001942
ACRYSC_09965	K43816_GM001943
ACRYSC_09975	K43816_GM001946
ACRYSC_09980	K43816_GM001947
ACRYSC_09985	K43816_GM001948
ACRYSC_09990	K43816_GM001949
ACRYSC_10005	K43816_GM001953
ACRYSC_10010	K43816_GM001954
ACRYSC_10020	K43816_GM001955
ACRYSC_10025	K43816_GM001956
ACRYSC_10030	K43816_GM001957
ACRYSC_10035	K43816_GM001958
ACRYSC_10040	K43816_GM001959
ACRYSC_10050	K43816_GM001960
ACRYSC_10055	K43816_GM001961
ACRYSC_10060	K43816_GM001962
ACRYSC_10065	K43816_GM001963
ACRYSC_10070	K43816_GM001964
ACRYSC_10080	K43816_GM001966
ACRYSC_10085	K43816_GM001967
ACRYSC_10090	K43816_GM001968
ACRYSC_10095	K43816_GM001969
ACRYSC_10100	K43816_GM001970
ACRYSC_10105	K43816_GM001971
ACRYSC_10110	K43816_GM001972
ACRYSC_10115	K43816_GM001973
ACRYSC_10120	K43816_GM001974
ACRYSC_10125	K43816_GM001975
ACRYSC_10135	K43816_GM001976
ACRYSC_10140	K43816_GM001977
ACRYSC_10145	K43816_GM001978
ACRYSC_10155	K43816_GM001980
ACRYSC_10160	K43816_GM001981
ACRYSC_10165	K43816_GM001982
ACRYSC_10170	K43816_GM001983
ACRYSC_10175	K43816_GM001984
ACRYSC_10180	K43816_GM001985
ACRYSC_10185	K43816_GM001986
ACRYSC_10190	K43816_GM001987
ACRYSC_10195	K43816_GM001988
ACRYSC_10200	K43816_GM001989
ACRYSC_10210	K43816_GM001991
ACRYSC_10215	K43816_GM001995
ACRYSC_10220	K43816_GM001996
ACRYSC_10225	K43816_GM001997
ACRYSC_10230	K43816_GM001998
ACRYSC_10235	K43816_GM001999
ACRYSC_10240	K43816_GM002000
ACRYSC_10245	K43816_GM002001
ACRYSC_10250	K43816_GM002002
ACRYSC_10255	K43816_GM002003
ACRYSC_10260	K43816_GM002004
ACRYSC_10265	K43816_GM002005
ACRYSC_10270	K43816_GM002006
ACRYSC_10275	K43816_GM002007
ACRYSC_10280	K43816_GM002008
ACRYSC_10285	K43816_GM002009
ACRYSC_10290	K43816_GM002010
ACRYSC_10295	K43816_GM002011
ACRYSC_10300	K43816_GM002012
ACRYSC_10305	K43816_GM002013
ACRYSC_10310	K43816_GM002014
ACRYSC_10315	K43816_GM002015
ACRYSC_10320	K43816_GM002016
ACRYSC_10325	K43816_GM002017
ACRYSC_10330	K43816_GM002018
ACRYSC_10335	K43816_GM002019
ACRYSC_10340	K43816_GM002020
ACRYSC_10345	K43816_GM002021
ACRYSC_10350	K43816_GM002022
ACRYSC_10355	K43816_GM002023
ACRYSC_10360	K43816_GM002024
ACRYSC_10365	K43816_GM002025
ACRYSC_10370	K43816_GM002026
ACRYSC_10375	K43816_GM002027
ACRYSC_10385	K43816_GM002029
ACRYSC_10390	K43816_GM002030
ACRYSC_10395	K43816_GM002031
ACRYSC_10405	K43816_GM002032
ACRYSC_10410	K43816_GM002033
ACRYSC_10415	K43816_GM002034
ACRYSC_10420	K43816_GM002035
ACRYSC_10425	K43816_GM002036
ACRYSC_10430	K43816_GM002037
ACRYSC_10455	K43816_GM002038
ACRYSC_10460	K43816_GM002039
ACRYSC_10465	K43816_GM002040
ACRYSC_10470	K43816_GM002041
ACRYSC_10475	K43816_GM002042
ACRYSC_10480	K43816_GM002043
ACRYSC_10490	K43816_GM002044
ACRYSC_10495	K43816_GM002045
ACRYSC_10505	K43816_GM002046
ACRYSC_10510	K43816_GM002047
ACRYSC_10515	K43816_GM002048
ACRYSC_10520	K43816_GM002049
ACRYSC_10525	K43816_GM002050
ACRYSC_10530	K43816_GM002051
ACRYSC_10535	K43816_GM002052
ACRYSC_10540	K43816_GM002053
ACRYSC_10545	K43816_GM002054
ACRYSC_10550	K43816_GM002055
ACRYSC_10555	K43816_GM002057
ACRYSC_10565	K43816_GM002058
ACRYSC_10570	K43816_GM002059
ACRYSC_10575	K43816_GM002060
ACRYSC_10580	K43816_GM002061
ACRYSC_10585	K43816_GM002062
ACRYSC_10590	K43816_GM002063
ACRYSC_10595	K43816_GM002065
ACRYSC_10600	K43816_GM002066
ACRYSC_10605	K43816_GM002067
ACRYSC_10610	K43816_GM002068
ACRYSC_10625	K43816_GM002070
ACRYSC_10630	K43816_GM002071
ACRYSC_10635	K43816_GM002072
ACRYSC_10640	K43816_GM002073
ACRYSC_10645	K43816_GM002074
ACRYSC_10650	K43816_GM002075
ACRYSC_10655	K43816_GM002076
ACRYSC_10660	K43816_GM002077
ACRYSC_10665	K43816_GM002078
ACRYSC_10670	K43816_GM002079
ACRYSC_10675	K43816_GM002080
ACRYSC_10680	K43816_GM002081
ACRYSC_10685	K43816_GM002082
ACRYSC_10690	K43816_GM002083
ACRYSC_10695	K43816_GM002084
ACRYSC_10700	K43816_GM002085
ACRYSC_10710	K43816_GM002086
ACRYSC_10725	K43816_GM002088
ACRYSC_10730	K43816_GM002089
ACRYSC_10735	K43816_GM002090
ACRYSC_10740	K43816_GM002091
ACRYSC_10745	K43816_GM002092
ACRYSC_10750	K43816_GM002094
ACRYSC_10755	K43816_GM002095
ACRYSC_10765	K43816_GM002097
ACRYSC_10770	K43816_GM002098
ACRYSC_10775	K43816_GM002099
ACRYSC_10780	K43816_GM002100
ACRYSC_10785	K43816_GM002101
ACRYSC_10790	K43816_GM002102
ACRYSC_10795	K43816_GM002103
ACRYSC_10800	K43816_GM002104
ACRYSC_10805	K43816_GM002105
ACRYSC_10810	K43816_GM002106
ACRYSC_10815	K43816_GM002107
ACRYSC_10825	K43816_GM002108
ACRYSC_10830	K43816_GM002109
ACRYSC_10835	K43816_GM002110
ACRYSC_10840	K43816_GM002111
ACRYSC_10845	K43816_GM002112
ACRYSC_10850	K43816_GM002113
ACRYSC_10855	K43816_GM002114
ACRYSC_10860	K43816_GM002115
ACRYSC_10865	K43816_GM002116
ACRYSC_10870	K43816_GM002117
ACRYSC_10890	K43816_GM002118
ACRYSC_10895	K43816_GM002119
ACRYSC_10905	K43816_GM002121
ACRYSC_10910	K43816_GM002122
ACRYSC_10915	K43816_GM002123
ACRYSC_10920	K43816_GM002124
ACRYSC_10925	K43816_GM002125
ACRYSC_10930	K43816_GM002126
ACRYSC_10935	K43816_GM002127
ACRYSC_10940	K43816_GM002128
ACRYSC_10945	K43816_GM002129
ACRYSC_10950	K43816_GM002130
ACRYSC_10955	K43816_GM002131
ACRYSC_10960	K43816_GM002132
ACRYSC_10965	K43816_GM002133
ACRYSC_10970	K43816_GM002134
ACRYSC_10975	K43816_GM002135
ACRYSC_10980	K43816_GM002136
ACRYSC_10985	K43816_GM002137
ACRYSC_10990	K43816_GM002138
ACRYSC_11000	K43816_GM002140
ACRYSC_11005	K43816_GM002141
ACRYSC_11010	K43816_GM002142
ACRYSC_11015	K43816_GM002143
ACRYSC_11020	K43816_GM002144
ACRYSC_11025	K43816_GM002145
ACRYSC_11030	K43816_GM002146
ACRYSC_11035	K43816_GM002147
ACRYSC_11040	K43816_GM002148
ACRYSC_11045	K43816_GM002149
ACRYSC_11055	K43816_GM002151
ACRYSC_11060	K43816_GM002152
ACRYSC_11065	K43816_GM002153
ACRYSC_11075	K43816_GM002155
ACRYSC_11085	K43816_GM002157
ACRYSC_11090	K43816_GM002158
ACRYSC_11095	K43816_GM002159
ACRYSC_11100	K43816_GM002160
ACRYSC_11105	K43816_GM002161
ACRYSC_11110	K43816_GM002162
ACRYSC_11115	K43816_GM002163
ACRYSC_11120	K43816_GM002164
ACRYSC_11125	K43816_GM002165
ACRYSC_11130	K43816_GM002166
ACRYSC_11135	K43816_GM002167
ACRYSC_11140	K43816_GM002168
ACRYSC_11145	K43816_GM002169
ACRYSC_11150	K43816_GM002170
ACRYSC_11155	K43816_GM002171
ACRYSC_11160	K43816_GM002172
ACRYSC_11165	K43816_GM002173
ACRYSC_11170	K43816_GM002174
ACRYSC_11175	K43816_GM002175
ACRYSC_11180	K43816_GM002176
ACRYSC_11185	K43816_GM002177
ACRYSC_11190	K43816_GM002178
ACRYSC_11195	K43816_GM002179
ACRYSC_11200	K43816_GM002180
[truncated: 2,648 more rows]
